# Supplementary material for: Optimal estimation of cloud properties from thermal infrared observations with a combination of deep learning and radiative transfer simulation
Source: Copernicus journal article supplement (doi:10.5194/amt-2024-87), 2024-05-08
Supplement: Supplementary file [file amt-2024-87-AC1-supplement.pdf]

## Response to Reviewer # 1

We thank the reviewer for the valuable comments. The manuscript has been modified according to the suggestions. Below are our specific responses to the reviewer's comments.

RC=Reviewer Comments

AR=Author response

TC=Text Changes

General comments:

The manuscript proposes a retrieval method to infer cloud optical thickness, cloud effective radius, and cloud top height from satellite thermal-infrared radiance measurements. The retrieval uses a synergetic method that combines optimal estimation (OE) and a convolutional neural network (CNN), and builds on the idea that the CNN provides the a-priori state on which the OE is applied. The authors validate their retrieval techniques against MODIS products (daytime observations) and DARDAR products (nighttime observations). The authors claim a good agreement between their results and the MODIS or DARDAR retrieval products. However, I am not convinced about the effectiveness of the retrieval, nor the novelty and advantage of the proposed method over the existing MODIS and DARDAR retrievals. First, this may be a consequence of the imprecise and ambiguous presentation of the results. Second, the paper has flaws in the presentation of the algorithm, the technique, and the analysis of the results. Several, easy to avoid typos make the manuscript difficult to understand. It raises the impression that the manuscript was not well prepared. After re-reading the manuscript several times, I have come to the conclusion that I do not recommend this manuscript for publication. The manuscript should only be considered for a second round of reviews after major revisions. The new manuscript version should explicitly highlight the advantages of the retrieval method compared to existing retrievals. The presentation, from typos over grammar to structure, must be improved. More specific comments are listed below

**Reply:** We thank the reviewer for the valuable comments. We have improved the paper after addressing the reviewer's comments. We highlighted the advantages of the retrieval method compared to existing retrievals in the abstract: compared to stand-alone OE which is ineffective to retrieve the optical thickness of thick clouds, the cloud properties retrieved by the new algorithm show an overall better performance. Compared with stand-alone machine-learning based algorithm, the radiances simulated based on retrievals from the new method align more closely with observations, and physical radiative processes are handled explicitly in the new algorithm.

(1) Line 107-108: The retrieval results are verified with MODIS or DARDAR products. MODIS or DARDAR retrievals themselves are based on assumptions, are maybe biased, and are subject to uncertainties. I am not questioning the quality of the MODIS or DARDAR products, but by using these products as a reference, the proposed retrieval will, in my opinion, never be better than the existing retrievals. Have you considered using "synthetic observations" based on large-eddy simulations (LES) coupled with radiative transfer (RT) simulations? Such LES and RT simulations would provide ground truth values of COT, CER, CTH, and radiances, and would allow a real evaluation of the proposed retrieval method.

**Reply:** Thanks for the comments. It is true that all observations have uncertainties. As you

mentioned, both MODIS and DARDAR have been demonstrated to be stable and accurate in climate research therefore, so they are used to test this method. Therefore, we first conducted training and inversion using MODIS daytime data, and then validated the training accuracy targeted at MODIS using DARDAR nighttime data to ensure the stability of this algorithm.

The advantage of OE-CNN-IR method can be demonstrated by Fig. 8c: the retrievals of stand-alone OE-IR method fails to retrieve COT greater than 15 (COT of deep convective clouds is typically greater than this value), but OE-CNN-IR successfully captures these thick clouds, so clearly OE-CNN-IR method is better than stand-alone OE-IR in capturing thick clouds.

Thanks for the suggestions on LES coupled with RT simulations, which would be a good tool if LES and RT are accurate enough. However, uncertainties induced by parameterizations exist in both LES and RT. In this work, the spatial statistic relationship between adjacent cloud pixels is used by OE-CNN-IR, but the clouds simulated by LES might be different from realistic clouds, so additional retrieval uncertainties would be induced by LES simulations. It is difficult to evaluate the uncertainties induced by LES, so we keep using MODIS+DARDAR validations.

(2) No information is provided about the convolutional neural network (CNN). In particular, the type of CNN, how it is configured, what data are used for training, how many MODIS granules are used during the training, etc? For the manuscript to be useful for the community, the CNN needs more explanation. Otherwise, the retrieval appears to be the typical “black box”.

**Reply:** Thanks for the comment. We added information on this. The CNN model architecture is shown in the following figure (Wang et. al.2022):

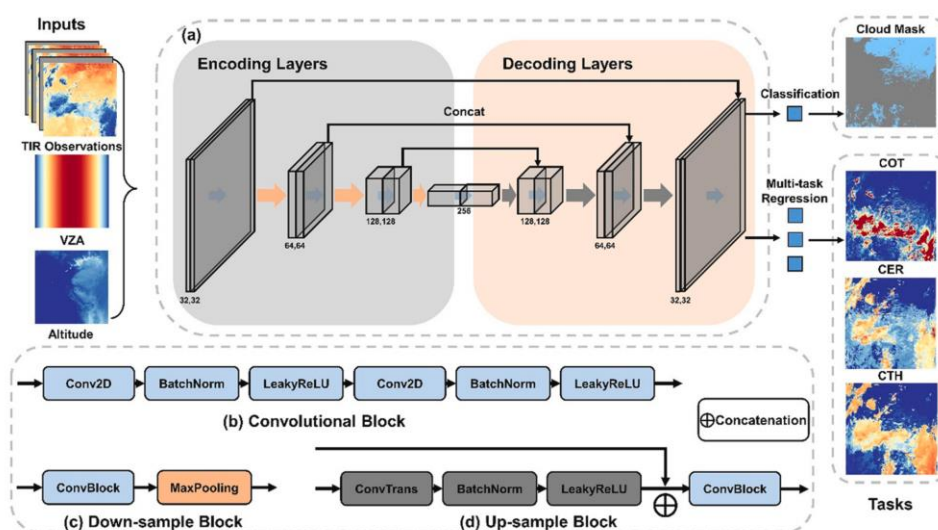

Fig. 1. The architecture of the TIR-CNN model. (a) The simple model architecture consists of encoder and decoder parts. (b) The operations within a basic convolutional block. (c) The operations within a down-sample block. (d) The operations within an up-sample block where  $\oplus$  means concatenation.

We added to the revised manuscript (2.2.2) the following text (Lines 210-220):

The convolutional neural network using thermal infrared (TIR-CNN) model is trained with solar-independent variables (thermal infrared radiances, viewing zenith angles, and altitude) as inputs and uses standard MYD06 products (COT, CER and CTH in the daytime) as targets. **To capture a comprehensive range of the Earth's surface and viewing geometries while accounting for seasonal variations, Wang et al. (2022) collected full-year granules from 2010 to create the training dataset. Products with a 10-day interval from 2011 were selected as the validation dataset during the training**

phase. Additionally, the 10-day interval data from 2009, which is independent of both the training and validation datasets, served as the testing dataset. The granules were divided into samples sized  $256 \times 256$  km. After preprocessing, there are 1,888,680 samples in the training dataset, 191,520 in the validation dataset, and 382,760 in the testing dataset. This TIR-CNN model is an asymmetric architecture, featuring an equal number of encoding and decoding layers arranged sequentially. The basic convolutional block consists of two 2D convolutional layers with  $3 \times 3$  kernels. Each convolutional layer is followed by a batch normalization layer and a leaky rectified linear unit (Wang et.al.,2022). Through training, the model can capture context and learn the complex nonlinear relationship between the input variables and targets, which can be applied in the cloud property retrievals during both daytime and nighttime. The convolutions in the TIR-CNN model are beneficial in considering statistic information from neighbor fields in training. Theoretically, spatial distributions, optical and microphysical properties of clouds are all determined by the meteorological backgrounds, so cloud properties are statistically connected to their horizontal distributions. In addition, the effective radius of ice cloud particles are functions of cloud temperature. The CNN-based deep learning architecture is able to capture the statistical features among adjacent pixels of satellite observations as a solution for retrieving cloud optical and microphysical properties (Wang et al., 2022, 2023), so it is able to provide more information than traditional algorithms that retrieve cloud properties from infrared radiances of individual pixels. The benefits of machine learning in IR cloud retrievals have also been demonstrated independently by the results of Tana et al. (2023) and Zhao et al. (2023).

(3) The individual retrieval methods should be explained more clearly to highlight their differences, advantages, and potential disadvantages. In this context, Fig. 1 should be used.

**Reply:** We added to the revised manuscript (2.2) the following text (Lines 145-151).

Figure 1 illustrates the architecture of our retrieval models. Initially, atmospheric parameters including temperature, humidity and ozone from the Fifth Generation of the European Centre for Medium-Range Weather Forecasts (ECMWF) Reanalysis (ERA5) are used to construct lookup tables for each  $0.25^\circ \times 0.25^\circ$  spatial grid box. These LUTs enumerate the BT for each channel corresponding to varying COT, CTH and CER. Subsequently, the OE method is performed to retrieve cloud properties. The OE method can get the optimal solution by accounting for all spectral information. However, the iteration may have started a long way from the solution in nonlinear problem and the cost function decrease is much slower. Start with a better first guess rather than climatology value can make the process converges much more quickly (Rodgers, 2000). The deep learning methods can achieve high accuracy, and once trained, they offer very fast prediction speeds. However, due to multiple neural networks, deep learning results often lack interpretability, leading to the perception of deep learning as a black box model.

(4) Regarding the general approach. It is not clear to me why CNN and OE need to be combined or what the physical rational supports this idea. CNN and OE are two different methods that could be run independently. Why run a CNN and add an OE approach? The authors state that CNNs are able to learn the complex non-linear relationships between observed radiance and cloud microphysical properties, and that CNN account for the spatial context. One could question if CNNs are not as good as claimed in the introduction.

**Reply:** The reason that we combine CNN and OE is that both stand-alone CNN and stand-alone OE have limitations: stand-alone OE (OE-IR) systematically underestimate the COT of thick clouds, so it is not accurate enough; stand alone CNN (TIR-CNN) is more accurate, but it is frequently criticized by the lack of physical interpretability (i. e., a black-box). The combined model (OE-CNN-IR) is better than OE-IR because it could retrieve COT of thick clouds.

Does adding OE onto a CNN retrieval really remove the criticism of CNN (Lines 81-85)?

**Reply:** OE-CNN-IR is better than stand-alone CNN in two ways: 1) CNN is a pure statistic model, while OE-CNN-IR accounts for the physics, so theoretically the reliability of OE-CNN-IR is better than stand-alone CNN. 2) The radiance simulations based on OE-CNN-IR retrievals exhibit greater consistency with actual observations than stand-alone CNN. It is true that OE-CNN-IR is not perfect, but it combines the advantages of OE and CNN.

(5) If CNN and OE are combined, would it not be better to go the other way and to improve the OE results with the CNN? This would be a well established approach, where CNN are used to improve existing retrieval methods.

**Reply:** Yes, we aim to improve the OE results with CNN and the method can be used to improve existing retrieval methods as you mentioned.

(6) The analysis lacks a clear story that shows which method – OE-IR or OE-CNN-IR – is superior to the other and why.

**Reply:** OE-CNN-IR is superior than OE-IR, because the former could retrieve COT of thick clouds (COT>15) while the latter could not. In chapter Conclusions, (Line 461-462), we provided a description that ‘The validation results reveal that the OE-CNN-IR method outperforms stand-alone OE-IR model, especially for cloud optical thickness of thick clouds.’

(7) Line 262: “with those derived from CRTM” It is unclear to me what is happening here. Did you use the MODIS retrieved values of COT, CTH and CER, and put them into CRTM to make radiance simulations?

**Reply:** Yes. I apologize for any confusion caused by the description. We have made the following modifications (Line 299): **Figure 6 compares MODIS observed BTs with simulated BTs derived from CRTM.**

Are these the values plotted on the y-axis with label “MYD06+CRTM” in Fig. 5 a,b,c ? If these are MODIS retrieval results and the resulting radiances / BT, do you have any explanation why the MODIS BT are higher than the simulations?

**Reply:** The simulated radiances depend on cloud top height (CTH) and vertical profile of air temperature. Biases in ERA5 air temperature profile and biases in MODIS CTH will lead to biases in simulated BT.

Is there still a difference in the ice optical properties despite of the correction factor of 0.4

**Reply:** Yes. The scaling factor is chosen to maximized the correlation between simulated BT and observed BT, but does not change the mean value significantly. It is likely that biases in MYD06

CTH (or ERA5 air temperature) is the primary contributor to the difference, because there is no bias when the OE-retrieved CTH is used (Fig.6 (g-l)).

Minor comments:

- Please check for consistent use of the serial comma.

**Reply:** Revised as suggested.

- Please check all units. There are typos throughout the paper, e.g., use km instead of KM- “Earth” is sometimes capitalized and sometimes not. Please be consistent.

**Reply:** Thank you for your meticulous review. ‘MYD021KM’ represents the product name, and we use ‘km’ as unit. And all ‘Earth’ have been changed as ‘earth’.

Line 44: Instead of “signifies” do you mean “depends on”?

**Reply:** We have revised as suggested (Line 44).

This approach is grounded in the principle that cloud reflectance in non-absorbing VIS wavelengths predominantly **depends on** COT,

Line 45: You could abbreviate “cloud effective radius” as it is done before.

**Reply:** We have described in Line 42 ‘such as cloud optical thickness (COT) and cloud effective radius (CER)’.

Line 55: Citation of Iwabuchi. Please replace uppercase letters with lowercase letters.

**Reply:** Corrected in the revised manuscript.

Line 63: The word “nears” might be replaced with “approaches”.

**Reply:** Corrected in the revised manuscript.

Line 64: Please give the wavelength range for your definition of far-infrared.

**Reply:** This far-infrared is the definition from (Libois et al., 2017) including band number from 1(6.8  $\mu\text{m}$ ) to 10 (14.2 $\mu\text{m}$ ) in MODIS and we have added in the revised paper.

Line 65: “their limited presence” is misleading. I guess you want to say that these wavelength ranges are rarely measured / satellites are not capable of measuring in these wl ranges. Please consider to rephrase this sentence.

**Reply:** Yes. We revised the sentence as follows (Line 65):

**these far infrared channels are rarely measured by satellites during the last decade.**

Lines 65-67: Plane-parallel computations are typically computationally efficient and widely applied. Contrarily, three-dimensional simulations are computationally expensive. Later in the manuscript you talk about the spatial awareness of CNN for cloud retrievals. You could elaborate on the topic of 3D radiative transfer simulations if they play a role in the thermal infrared.

**Reply:** Thank you for your suggestion. Here we mainly emphasize that simulating a global database consumes a lot of computing power. 3D radiative transfer simulations can be applied in our further

study.

Lines 75-76: Are you saying that CNN methods are better than traditional look-up-table approaches? I would suggest rephrasing this sentence to better convey the main message.

**Reply:** We revised as follows (Lines 75-76):

The retrieved results show good agreements compared to both passive and active cloud products and is effective during both daytime and nighttime.

Line 80: What is FY4A? Please explain.

**Reply:** We revised as follows:

using Fengyun-4A satellite observations.

Lines 81-85: Could you please elaborate on the meaning of “lacking direct physical interpretation” as well as “offer explicit physical interpretations”. What do you mean by that?

**Reply:** We mean that deep learning models, especially neural networks, consist of numerous layers and parameters (weights and biases). The interactions between these layers can be intricate, making it difficult to trace how input data is transformed into output predictions. Unlike traditional models, where parameters can be directly interpreted (like coefficients in linear regression), deep learning models do not provide straightforward explanations for their output.

The revised context is as follows (Lines 81-83):

However, the reliance of these machine learning methods on mathematical and statistical approaches typically leads to an implicit assimilation of the relationships between cloud properties and radiance observations, making it difficult to trace how input data is transformed into output predictions.

Line 86: [...] integrate [...] with. It might be “integrate [...] into” or “combine [...] with”. Please check your grammar.

**Reply:** We revised as follows:

In this study, we combine traditional radiative transfer simulations with TIR-CNN retrievals using the OE method

Line 90 and elsewhere: Please check whether you mean “priority” or “a-priori”. In OE one usually refers to “a-priori”.

**Reply:** Thank you for your meticulous review. We have changed all description to ‘a priori’.

Line 98: Could you please specify “global data”?

**Reply:** ‘Global data’ refers to data that is collected, processed, and analyzed on a worldwide scale.

Line 98: I suggest replacing “spacecraft” by “satellite”

**Reply:** Revised as suggested.

Lines 100-102: Please check the grammar of this sentence. “For this research, [...] for this study.”

**Reply:** Thank you for your meticulous review. We revised as follows (Lines 101-103):

The Aqua-MODIS official Collection 6.1 (C6.1) products (MYD021KM, MYD03, MYD35,

MYD06 and MCD12C1), with the spatial resolution of 1 km, available at <https://ladsweb.modaps.eosdis.nasa.gov/search/>, have been selected for this study.

Lines 100-101: It would be beneficial to list the MODIS products used, explicitly stating their spatial resolution and the quantities extracted from each product. While you do this in Table 1 it is missing in Lines 100-101.

**Reply:** We revised as follows:

The Aqua-MODIS official Collection 6.1 (C6.1) products (MYD021KM, MYD03, MYD35, MYD06 and MCD12C1), with the spatial resolution of 1 km, available at <https://ladsweb.modaps.eosdis.nasa.gov/search/>, have been selected for this study.

We converted the 1 km resolution data to 5 km resolution for our analysis. The volume of data is substantial, but we haven't specifically quantified the number of data points.

Lines 103: Change “radiations” to “radiation” ?

**Reply:** Revised as suggested.

Lines 108-109: “All parameters are aligned to a 5-kilometer spatial resolution grid, ensuring data and variable consistency”. Does this mean you have projected all parameters on a regular 5 kilometer grid. How do you deal with parameters at 1km resolution? Do you interpolate them or do you use nearest neighbor method for the selection?

**Reply:** We averaged the 1 km resolution data to create 5 km resolution data.

Line 109: Suggestion: Replace “universality” with “applicability” ?

**Reply:** Revised as suggested.

Line 109: What do you mean by “variable consistency”? This is contradictory, you could rephrase the sentence to be clearer.

**Reply:** We revised as follows (Line 114):

All parameters are aligned to a 5-kilometer spatial resolution grid, ensuring uniformity in data and variables.

Line 110: How do you choose a day from each month? By chance or by some specific method or criteria?

**Reply:** The default spacing between adjacent days is 30, and the spacing is set to be 40 if a date lies in the same month as previous date. We added the information to the main text (Lines 115-119):

retrievals are compared to MYD06 data from one day each month in 2009 (January 1, February 10, March 12, April 11, May 11, June 10, July 10, August 9, September 8, October 8, November 7, and December 7. The default spacing between adjacent days is 30, and the spacing is set to be 40 if a date lies in the same month as previous date)

For the comparison with DARDAR data, the whole year’s data is used.

Lines 113-114: “By selecting days representative of each month, we aim to assess the algorithm's performance under varying seasonal and weather patterns.” You wrote this 2 sentences before.

Please check, rearrange, or delete for more concise writing

**Reply:** We deleted this sentence.

Table 1: Could you provide the wavelength ranges for the bands? The unit of cloud water path should be “kg/m<sup>2</sup>”, using a lower case “k”. Spectral bands itself do not have a unit. They depict a wavelength range. What you mean is radiance instead of Band X? Please correct.

**Reply:** Revised as suggested.

Line124: replace “adept” with “suited to”?

**Reply:** Revised as suggested.

Line 131: Before writing about “our retrieval methods” could you please introduce the models that you are using? You could use Fig.1 to better introduce your general retrieval concept. Fig. 1 is only mentioned once and never explicitly explained.

**Reply:** Thank you for your suggestion and we add following description in (Lines139-140):

The core algorithm of our inversion method is the optimal estimation method, which utilizes the CRTM as the forward model and incorporates CNN results as a prior information.

Line 131: “... including temperature,...” Does this mean that you incorporate all ERA5 variables in your analysis? “including” suggests that you use all of them, not just a few. Please explicitly state which data from ERA5 you are using.

**Reply:** The revised context is as followed (Lines 141-143):

Initially, temperature, humidity and ozone from the Fifth Generation of the European Centre for Medium-Range Weather Forecasts (ECMWF) Reanalysis (ERA5) (Hersbach et al., 2020) are used to construct lookup tables for each 0.25°x0.25° spatial grid box.

Line 131 / Fig1: After the introduction of Figure1 it would be very beneficial if the authors could explain at least one iteration of the model. Particularly highlighting the difference between the OE IR and the OE-CNN-IR method.

**Reply:** We added to the revised manuscript (2.2) the following text (Lines 151-154).

In OE-CNN-IR approach, the TIR-CNN derived cloud properties provide a priori state for iterative processes, which are subsequently refined through iterative minimization of the objective cost function, while the climatology values were used as starting points in OE-IR.

Line 133: Do you construct look-up-tables based on the ERA5 data, i.e., a hypercube of ERA5 data, or do you construct look-up-tables of simulated radiance based on the ERA5 data?

**Reply:** We construct look-up-tables of simulated radiance based on the ERA5 data.

Line 134 or earlier: When introducing ERA5 please cite Hersbach et al. 2020. The full citation is given at the end of the report.

**Reply:** Thank you for your suggestion and we have cited this paper.

Line 138: “This method iteratively adjusts parameters to reconcile observed data with model



predictions.” Isn’t it the other way around? As I understand OE, the inputs to the forward model are iteratively adjusted such that the model output closely matches the observations. Please check.

**Reply:** We have revised as follows (Lines 154-155):

This method iteratively adjusts parameters to reconcile model predictions with observed data.

Line 148-149: “ and is able to simulate the radiances observed by satellites. ” This has already been mentioned above. Please rephrase the paragraph and remove duplicate text.

**Reply:** We have deleted this sentence.

Line 150: Suggestion: Replace “corroborated” with “validated”

**Reply:** Revised as suggested.

Lines 150-154: Please check grammar. Please also specify which habit (mixture) you are using in your forward simulations.

**Reply:** We use ICE\_CLOUD type in CRTM and we have revised as follows (Lines 167-170):

Considering that the optical properties of ice cloud crystals in the CRTM and MODIS products differ due to variations in particle habit assumptions (Yi et al., 2016; Yao et al., 2018), the volumetric extinction cross section in the CRTM is adjusted by a scaling factor of 0.4, resulting in simulated brightness temperatures that are consistent with observations (Fig. 6(a, b, c)).

Line 155: “various COT,..” do you mean “combinations of”. Please check and change if needed.

**Reply:** We revised as follows (Line 171):

For each grid cell, the CRTM simulates TIR radiances corresponding to a set of COT, CER, and CTH values at each location, from which a LUT is subsequently constructed.

Table2: This table is difficult to understand because the column “Notes” mixes various information, i.e., products and parameter steps. You could also choose a better way to present the COT, CER, and CTH ranges, e.g., by giving intervals and step sizes. Please add spaces between the number and the unit (and check for this in the entire manuscript).

Please revise the table and make it more clear. Otherwise I suggest to remove the table.

**Reply:** Revised as suggested.

Line 162: “observations in” to “observations of”

**Reply:** Revised as suggested.

Lines 165ff: Please use sub figure labels [(a), (b),...] to guide the reader through the Figure. In that way the reader is directed to the correct sub panel, which facilitates the understanding of the text.

**Reply:** Revised as suggested.

Line 173: In several instances the authors switch between “liquid clouds” and “water clouds”. Please revise the entire text to be consistent. All clouds consist of water. To be precise one should distinguish between “ice water” and “liquid water”.

**Reply:** We have changed all ‘water cloud’ to ‘liquid cloud’.

Figures in general: Captions are not in bold. Only the figure number and the sub panel label, e.g., (a), is in bold.

**Reply:** Revised as suggested.

Fig2: You changed the y-range of Fig2b but kept it constant everywhere else. It would be beneficial to keep the same range (220-280 K) for all panels. This helps to compare with Fig.3

**Reply:** Thank you for your suggestion and we have revised as suggested.

Line 193: “standard MYD06 products” Please explicitly state which variables you are using. Or do you use all variables provided in the product?

**Reply:** We revised as follows (Line 210):

The convolutional neural network using thermal infrared (TIR-CNN) model is trained with solar-independent variables (thermal infrared radiances, viewing zenith angles, and altitude) as inputs and uses standard MYD06 products (COT, CER and CTH in the daytime) as targets.

Line 196: What is meant with “convolutions”? Please explain.

**Reply:** We revised as follows (Lines 218-220):

The basic convolutional block consists of two 2D convolutional layers with  $3 \times 3$  kernels. Each convolutional layer is followed by a batch normalization layer and a leaky rectified linear unit (Wang et.al.,2022).

Lines 209-210: “model predictions” is ambiguous. Do you mean simulation results from the forward model?

**Reply:** Yes, and we have revised as ‘model simulations’.

Line 212: Suggestion: Replace “proficiency” with “capability” or “ability”.

**Reply:** Revised as suggested.

Line 217: Equation 2: Typo.  $X_a$  should be  $X_a$ , I guess?

**Reply:** Revised as suggested.

Line 221: Suggestion: Replace “encapsulated” by “implemented”. And it is more a gradient decent method instead of a “gradient decent iterative process”. You might rephrase the sentence.

**Reply:** Revised as suggested (Line 249).

Mathematically, the gradient descent method for  $(i+1)$ 'th iteration is implemented by:

Line 226: “and is set to be the same for all three variables” Do you refer to the learning rate. If so please rephrase the text.

**Reply:** We have revised as follows (Line 254):

$\theta$  represents a learning rate and  $n$  represents the  $n$ -th cloud parameters (COT, CER and CTH), and  $\theta$  is set to be the same for all three variables.

Line 242: If the results of the OE-CNN-IR remain at the a priori values, does this not mean that the

iteration fails? It means that the information content of the measurements is not taken into account.?

**Reply:** When the OE-CNN-IR retrieval is close to the priori values, it suggested that the priori values are realistic. (this is true for many cases, because the performance of stand-alone CNN model is good).

Line 244: Please elaborate what you mean with “function effectively.”

**Reply:** We revised as follows (Lines 272-273):

However, for large COT values, the OE-IR method is unable to produce accurate results under these conditions.

Line 244: How do you know that the COT is correctly determined? You minimize the cost function between the observed and simulated radiances but this does not necessarily mean that the retrieved COT is correct. If you want to prove a correct COT retrieval you should plot the true / expected COT, CER, and CTH values together with your retrieval results in Fig4.

**Reply:** Revised as suggested.

Fig4. Please add the COT values associated with “A thin cloud case” and “ A thick cloud case”. What do you mean by “thin” and “thick”? Optically or geometrically. Please specify.

**Reply:** We denote  $COT < 10$  as thin cloud and  $COT > 10$  as thick cloud and we have added in the paper.

Line 249: A feature of OE is the estimation of the errors that are associated with the a priori and a posteriori information, i.e., the uncertainties introduced by the measurements. In my opinion, this should be included, at least mentioned, in the section of OE. If you do not plan to use the OE uncertainty estimates from the OE technique please state why.

**Reply:**  $S_y$  is the covariance matrices of the observation-to-simulation differences and it have taken these errors into account including the uncertainties introduced by the measurements.

Line250: “.. forecast errors..” do you mean errors in the forward simulation. You are not making a forecast in the traditional sense.

**Reply:** We have revised as suggested.

Line 259: It is unclear which method you are referring to: OE-CNN-IR or OE-IR.

**Reply:** We have revised in 2.2 and more detailed description have been added.

Line 261ff: Is there a particular reason, why you chose this particular MODIS granule?

**Reply:** We randomly select a granule for example.

Line 261: It would be more convenient to start with the figure that is currently Fig.6 and then showing Fig5. In this way the order would be more logical by showing the spatial distribution first and then the correlation.

**Reply:** Thanks for the suggestions. We rearranged Fig. 5 and Fig 6

Line 262. You are jumping between figures. Starting with 6, going to 5 and going back to 6 again.

Please rearrange the entire section 3.1 and the figures.

**Reply:** Thanks for the suggestions. We rearranged Fig. 5 and Fig 6, and the corresponding statements.

Lines 273-275: Do you want to say that OE-IR is better than OE-CNN-IR? This would contradict your argumentation that the combination of CNN and OE is beneficial. Please check.

**Reply:** Sorry for the misunderstanding. We have revised as follows (Lines 339-342):

The OE-CNN-IR model incorporates the OE iterations, which reduce the discrepancy between simulated and observed BT. The results indicate that retrievals of the OE-CNN-IR methods align more closely with BT observations compared to the stand-alone TIR-CNN model.

Lines 292-294: This is a trivial statement. Radiances or converted brightness temperatures are used for cloud property retrieval. This is the basis of all cloud property retrievals, e.g., of the MODIS retrieval that you use as a reference.

**Reply:** We deleted this statement.

Lines 299-301: Please explain where the substantial differences come from.

**Reply:** We added explanations on the difference (Lines 307-312):

However, significant differences are noted in CER retrieved by OE-CNN-IR and MYD06 products. This finding aligns with the work of Wang et al. (2016), which highlighted substantial discrepancies in CER retrieval when using OE-IR versus VNIR/SWIR/MWIR methods. Specifically, the C6 MYD06 cloud particle size information presented here is inferred from the 2.1  $\mu\text{m}$  reflectance, which may capture signals reflected from the lower parts of a cloud (Zhang et al., 2009).

Zhang, Z., Yang, P., Kattawar, G., Riedi, J., -Labonnote, L. C., Baum, B. A., Platnick, S., and Huang, H.-L.: Influence of ice particle model on satellite ice cloud retrieval: lessons learned from MODIS and POLDER cloud product comparison, *Atmos. Chem. Phys.*, 9, 7115–7129, doi:10.5194/acp-9-7115-2009, 2009.

Line 302: “below a certain threshold”. Please explicitly mention the threshold and give a number.

**Reply:** We revised as ‘below 10’.

Figure6: The figure is difficult to read. Images and labels are too small, please enlarge.

**Reply:** Revised as suggested.

Line 343: Please explain how selecting data between 60N and 60 ensures “consistency and reliability in these comparisons”.

**Reply:** We have revised as follows (Lines 376-379):

Due to the large uncertainties of MODIS in retrieving COT in polar regions, retrieval constraints have been established. These include limiting the Solar Zenith Angle (SZA) to less than 60 degrees and restricting latitudes to between 60°S and 60°N, thereby ensuring consistency and reliability in these comparisons.

Line 346: what do you mean with “all clouds”: ice and liquid water clouds? The caption of Fig 8

says ice clouds but over land and ocean. Please be more specific and rephrase.

**Reply:** We have revised and Fig 8 is Scatterplots of the pixel level comparisons between the retrievals and MYD06 products for ice clouds over oceans while Fig 9 is Same as Fig. 8, but includes liquid clouds over ocean, and ice and liquid clouds over land.

Line 357: “to be concentrated around the a priori value of 30  $\mu\text{m}$ ,” does this not mean that the OE retrieval is too much constrained by the a priori value and does not take the measurements into account. This would be an indication that the retrieval does not work for this value.

**Reply:** Yes, because CER is not sensitive to thermal bands, the retrieved values are not far away from the initial values.

Line 362: “all types of clouds”. Please be more specific: ice, liquid water over land or ocean?

**Reply:** We revised as follows (Line 396):

Figure 9 expands the ice cloud analysis from Fig. 8 to encompass liquid and ice clouds over both land and ocean

Line 368: “effective estimation of priori states” Does this not mean that you are getting the retrieved values from ERA5? Then why use satellite data?

**Reply:** Sorry for the misunderstanding. Cloud information from ERA5 is not used in this study. We revised the sentence as follows (Lines 400-403):

In contrast, the performance of OE-CNN-IR is much better. This shows OE-CNN-IR can be improved by using TIR-CNN outputs as a priori state, allowing for accurate retrievals even in situation of lower BT sensitivity, as observed in liquid clouds.

Line 390: How many samples do you get from 2009? Please specify.

**Reply:** There are over 4.7 million samples when compared to MYD06, and 0.54 million samples when compared to DARDAR. More detailed information has been added in 2.1.1 (Line 120):

The total sample size of MYD06 for comparison is ~4.7 million.

and in 2.1.2 (Lines 135-137):

the ice cloud product of DARDAR in 2009 is used to evaluate the inversion results during both daytime and nighttime conditions, and ~0.54 million pixels are collocated in the comparison processes.

Line 393: Please state what you mean with “meaningful assessment”.

**Reply:** ‘Meaningful assessment’ refers to an evaluation that is both accurate and relevant, allowing for insightful conclusions about the OE model's nighttime performance. In this context, it implies that the criteria help ensure the data from the two instruments align closely enough to provide reliable insights into how well the model operates at night.

Lines 399-400: “notably in the context of the challenges involved in accurately retrieving COT for ice clouds.” This contradicts your statement in Lines 365-366 where you argue that OE-CNN-IR is well suited to retrieve optically thin ice clouds.

**Reply:** We revised this sentence (Lines 431-433): The daytime correlation coefficient for OE-CNN-IR versus DARDAR COT is 0.651, with slightly lower nighttime correlation of 0.583. These values

are similar to the correlation between MYD06 COT and DARDAR COT (0.647).

Line 364: What does “thick water clouds” mean? Do you mean optically thick or geometrically thick?

**Reply:** We changed as follows (Lines 398-399):

In the case of liquid clouds above 10, the BT is not sensitive to COT, leading to most OE-IR COT retrievals clustering around value of 10.
